# Supplementary material
Source: PubMed Central journal article supplement (PMC6446200)
Supplement: EMBR-20-e46927-s001.pdf [file EMBR-20-e46927-s001.pdf]

**Table of Contents**

|                           |         |
|---------------------------|---------|
| <b>Appendix Figure S1</b> | Page 2  |
| <b>Appendix Figure S2</b> | Page 3  |
| <b>Appendix Figure S3</b> | Page 5  |
| <b>Appendix Figure S4</b> | Page 6  |
| <b>Appendix Figure S5</b> | Page 7  |
| <b>Appendix Figure S6</b> | Page 8  |
| <b>Appendix Figure S7</b> | Page 9  |
| <b>Appendix Figure S8</b> | Page 10 |
| <b>Appendix Table S1</b>  | Page 11 |

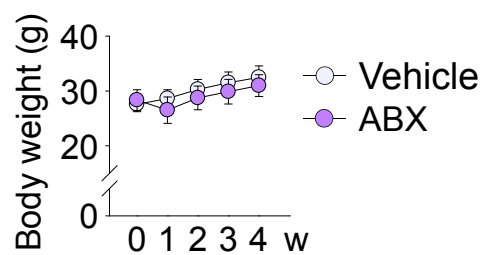

**Appendix Figure S1. The effect of gut microbiota depletion is insignificant on the body weight during regular chow feeding.**

Body weight curve of vehicle- and ABX-treated mice. w, weeks after vehicle or ABX treatment (n = 8 mice/group).

Data information: Data are represented as means  $\pm$  SD.

**A**

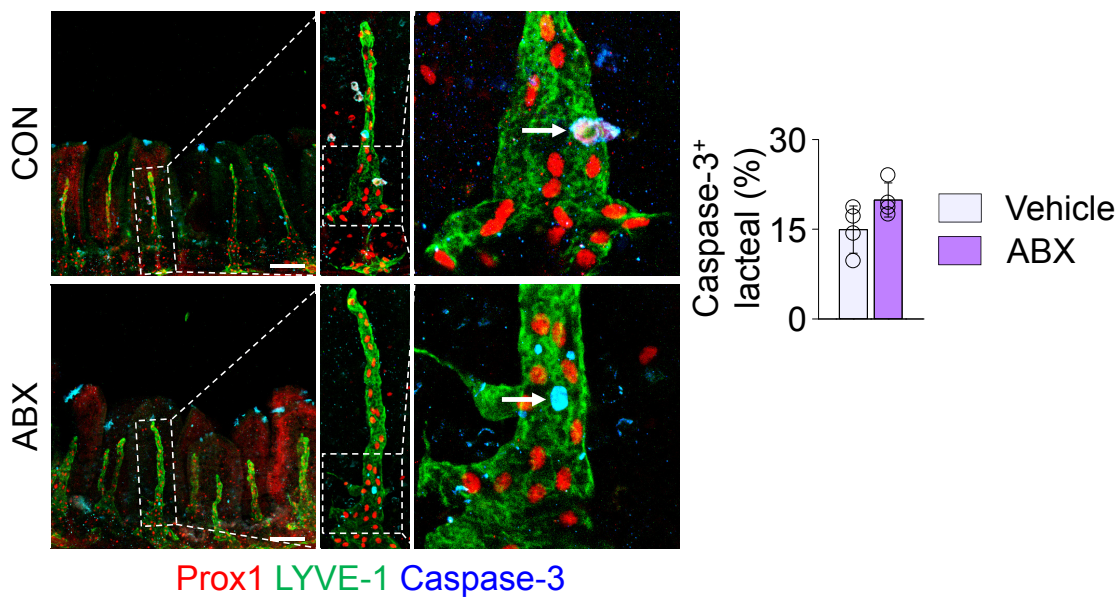

**B**

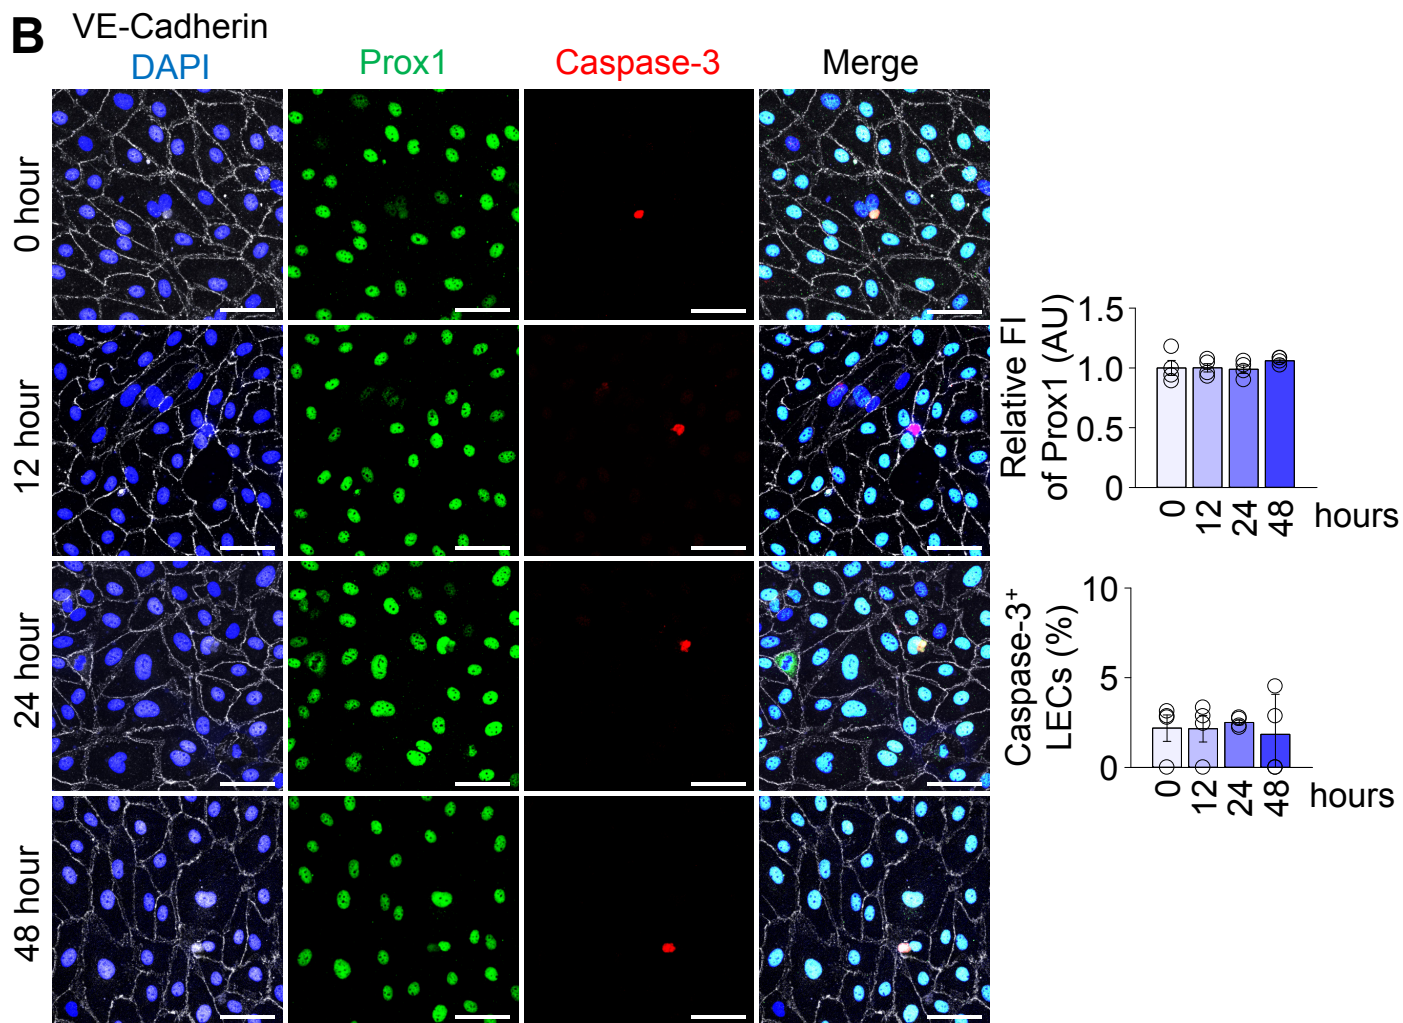

**Appendix Figure S2. Depletion of gut microbiota does not induce the apoptosis of LECs of lacteals.**

(A) Images and comparisons of the percentage for caspase-3<sup>+</sup> signals on LYVE-1<sup>+</sup> lacteals in jejunum from vehicle- or ABX-treated mice. Mice were sacrificed at 1-week post treatment of vehicle or ABX. Each boxed portion is highly magnified in right. Note that caspase-3 signal (arrows) is not merged with Prox1 signal. Each dot indicates mean value of 5-10 villi in a mouse (n = 4 mice/group). Scale bars, 100  $\mu$ m. (B) Images and comparisons of Prox1 and caspase-3 expression in human dermal LEC at indicated time points after antibiotics combination treatment. The relative expression levels of Prox1 presented as fold (vehicle as 1) and the percentage of caspase-3<sup>+</sup> cells were quantified (n = 4). The concentrations of each antibiotics are vancomycin, 50 ng/ml; ampicillin, 100 ng/ml; metronidazole, 100 ng/ml; neomycin, 100 ng/ml. Scale bars, 50  $\mu$ m.

Data information: Data are represented as means  $\pm$  SD (A) and means  $\pm$  SEM (B).

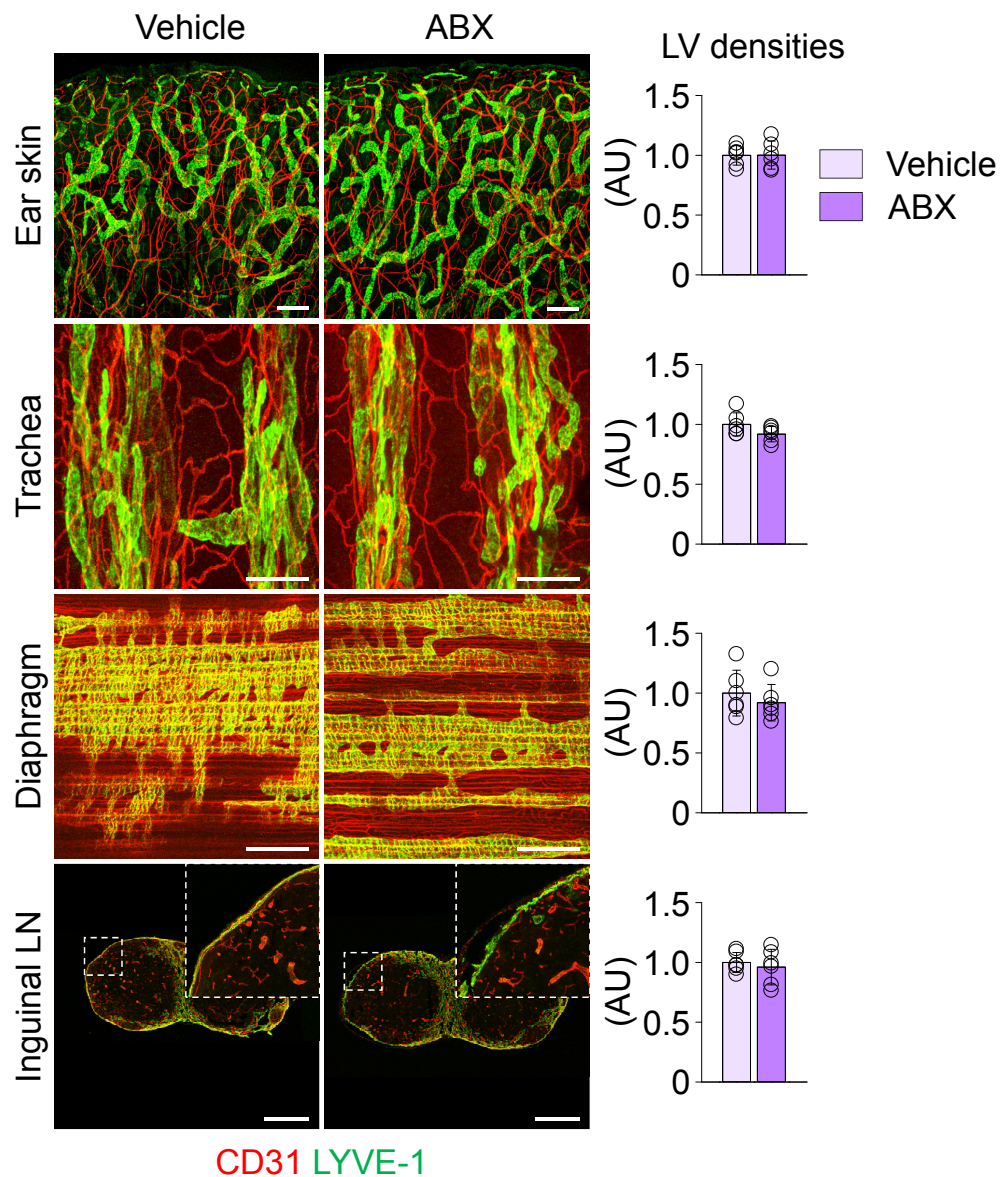

**Appendix Figure S3. Depletion of gut microbiota does not affect lymphatic vessel densities of extra-intestinal organs.**

Images and comparisons of LYVE-1<sup>+</sup> lymphatic vessel (LV) densities in the ear skin, trachea, diaphragm, and inguinal LN from vehicle- and ABX-treated mice. AU, arbitrary unit. All scale bars, 200  $\mu$ m. Each dot indicates mean value of 5 sites in a mouse (n = 6 mice/group).

Data information: Data are represented as means  $\pm$  SD.

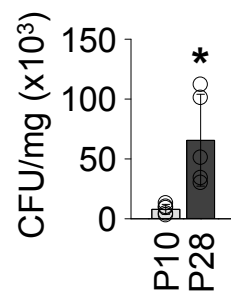

**Appendix Figure S4. Gut microbiota quantitatively expands during weaning from lactation.**

Comparison of bacterial colony forming unit (CFU) in feces from P10 and P28 mice (n = 5 mice/group).

Data information: Data are represented as means  $\pm$  SD. \*P < 0.05 vs. P10 mice by two-tailed unpaired Student's t-test.

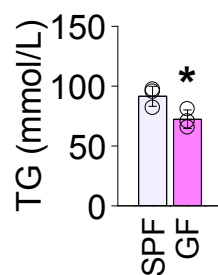

**Appendix Figure S5. Triglyceride level in the lymph from thoracic duct is reduced in GF mice.**

Comparisons of triglyceride (TG) in the lymph from thoracic duct from SPF and GF mice (n = 3 mice/group). The lymph was collected 1 hour after oral lipid loading. Data information: Data are represented as means  $\pm$  SD. \*P < 0.05 vs. SPF mice by two-tailed unpaired Student's t-test.

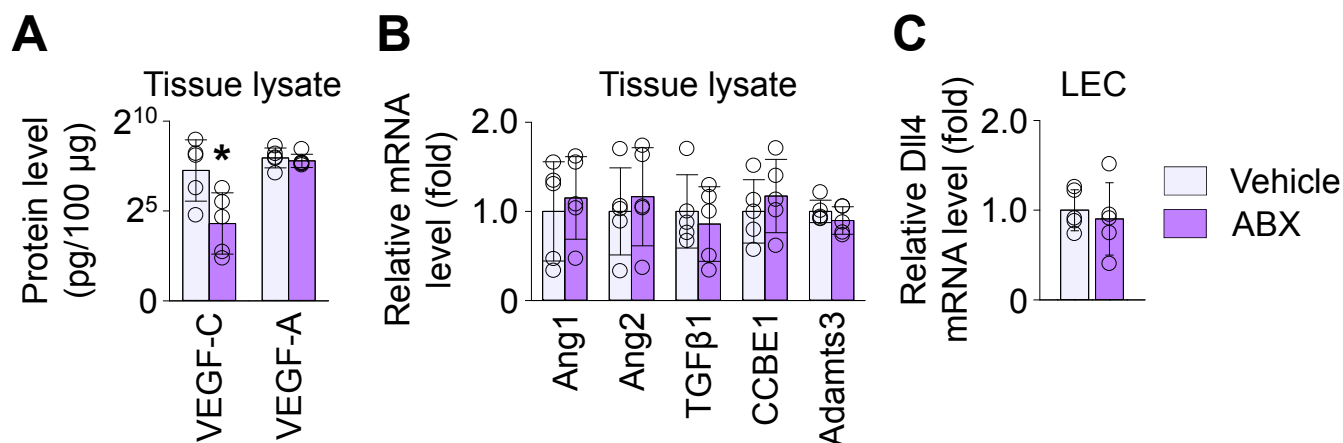

### Appendix Figure S6. Tissue VEGF-C level depends on gut microbiota.

(A) Comparison of protein levels of VEGF-C and VEGF-A in jejunum and ileum of vehicle- and ABX-treated mice (n = 5 mice/group). (B) Comparison of mRNA levels of angiopoietin 1 (Ang1), Ang2, transforming growth factor  $\beta$ 1 (TGF $\beta$ 1), collagen- and calcium-binding EGF domains 1 (CCBE1) and a disintegrin and metalloproteinase with thrombospondin motifs 3 (Adamts3) in the whole tissue of jejunum and ileum from vehicle- and ABX-treated mice (n = 5 mice/group). (C) Comparison of mRNA levels of Dll4 in LECs of jejunum and ileum from vehicle- and ABX-treated mice (n = 5 mice/group).

Data information: Data are represented as means  $\pm$  SD. \*P < 0.05 vs. vehicle-treated mice by two-tailed unpaired Student's t-test.



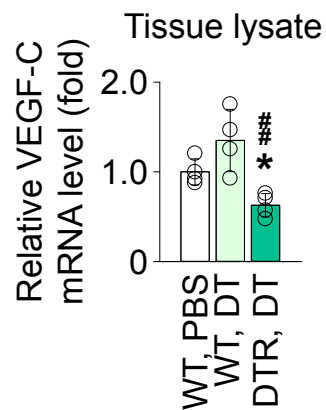

**Appendix Figure S7. Intraperitoneal administration of diphtheria toxin does not increase tissue VEGF-C level in the intestine of wild type mice.**

Comparison of VEGF-C mRNA levels in the jejunum and ileum of PBS-treated WT (WT, PBS), diphtheria toxin (DT)-treated WT (WT, DT), and DT-treated CX3CR1-DTR (DTR, DT) mice (n = 4 mice/group).

Data information: Data are represented as means  $\pm$  SD. \*P < 0.05 vs WT, PBS; ## P < 0.01 vs. WT, DT by one-way ANOVA with Bonferroni's multiple comparison test.

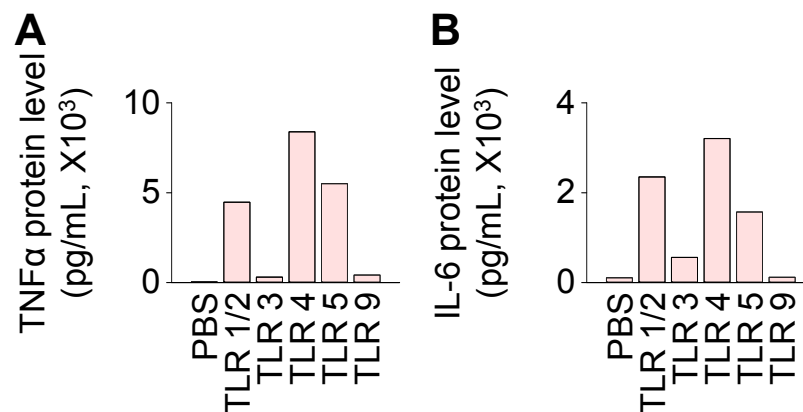

**Appendix Figure S8. The stimulation of TLRs with specific agonists induces the production of inflammatory cytokines by macrophages.**

(A, B) Measurement of TNF $\alpha$  (A) and IL-6 (B) protein level in the culture media after stimulation of primary intestinal macrophages with specific TLR agonists (n = 3).

The following TLR agonists at indicated concentrations were treated: palmitoyl-3-cysteineserine-lysine-4 (TLR1/2 agonist, 1  $\mu$ g/ml), poly(I-C) (TLR3 agonist, 10  $\mu$ g/ml), lipopolysaccharide (TLR4 agonist, 5  $\mu$ g/ml), flagellin (TLR5 agonist, 0.1 mg/ml), or bacterial DNA (TLR9 agonist, 10  $\mu$ g/ml).

Data information: Data are representative of three independent experiments.

| Genes           |         | Sequence                  |
|-----------------|---------|---------------------------|
| <i>mVegf-C</i>  | Forward | CGTTCTCTGCCAGCAACATTACCAC |
|                 | Reverse | CTTGTTGGGTCCACAGACATCATGG |
| <i>mAngpt1</i>  | Forward | CACATAGGGTGCAGCAACCA      |
|                 | Reverse | CGTCGTGTTCTGGAAGAATGA     |
| <i>mAngpt2</i>  | Forward | CCTCGACTACGACGACTCAGT     |
|                 | Reverse | TCTGCACCACATTCTGTTGGA     |
| <i>mTgfb1</i>   | Forward | CTCCCGTGGCTTCTAGTGC       |
|                 | Reverse | GCCTTAGTTTGGACAGGATCTG    |
| <i>mCcbe1</i>   | Forward | AAACAAGATCACCACGACCAAA    |
|                 | Reverse | CTCGCGGTCATATCGGTATCC     |
| <i>mAdamts3</i> | Forward | ATTACCTCCTCACCCTGATGAAC   |
|                 | Reverse | ATATGCACTCCGAGGGACTCATC   |
| <i>mDII4</i>    | Forward | GGAACCTTCTCACTCAACATCC    |
|                 | Reverse | CTCGTCTGTTCGCCAAATCT      |
| <i>mGapdh</i>   | Forward | AATGTGTCCGTCGTGGATCT      |
|                 | Reverse | CATCGAAGGTGGAAGAGTGG      |

**Appendix Table S1. Primer sequences for quantitative real-time PCR.**
