# Supplementary material
Source: PubMed Central journal article supplement (PMC6446200)
Supplement: EMBR-20-e46927-s002.pdf [file EMBR-20-e46927-s002.pdf]

## Expanded View Figures

### Figure EV1. Depletion of gut microbiota leads to relatively minor changes in the blood vasculature of intestinal villi.

- A Images and comparisons of CD31<sup>+</sup> blood vessel (BV) densities and VEGFR2 expression (presented as relative fluorescent intensity (FI)) in the tip portion of villi in the jejunum of vehicle- or ABX-treated mice. Scale bars, 100  $\mu$ m. AU, arbitrary unit. Each dot indicates mean value of 5–10 villi ( $n = 6$  mice/group).
- B Representative images of button-like, discontinuous VE-cadherin junction in the lymphatic capillary of ear skin (left) and zipper-like, continuous VE-cadherin junction in the collecting lymphatic vessel of mesentery (right). Note that LECs in lymphatic capillary are Prox1<sup>+</sup> LYVE-1<sup>+</sup>, while LECs in lymphatic collector are Prox1<sup>+</sup> LYVE-1<sup>-</sup>. Scale bars, 50  $\mu$ m.
- C Images of VE-cadherin LEC junctions in CD31<sup>+</sup>/LYVE-1<sup>-</sup> blood capillary plexus of jejunum between vehicle- and ABX-treated mice. Note no difference in blood endothelial cell junctions of capillary plexus in villi between vehicle- and ABX-treated mice. Scale bars, 100  $\mu$ m.

Data information: Data are represented as means  $\pm$  SD. \*\* $P < 0.01$  versus vehicle-treated mice by two-tailed unpaired Student's  $t$ -test.

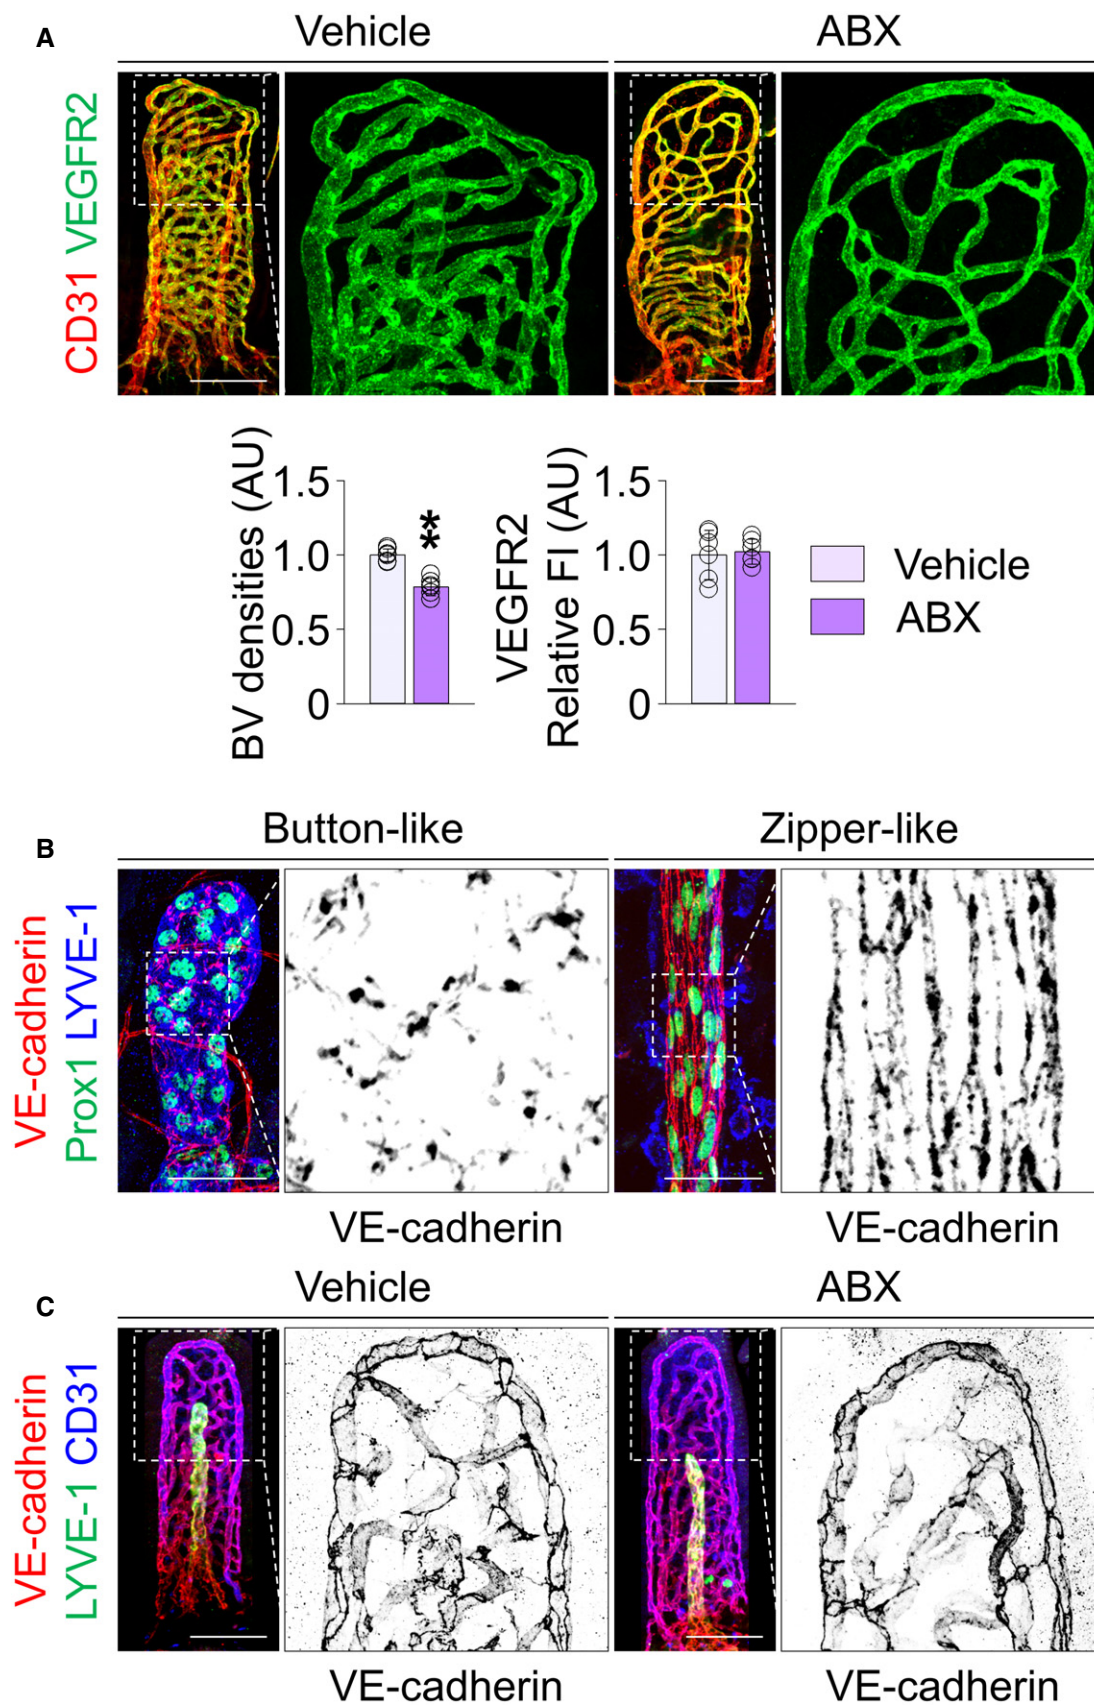

Figure EV1.

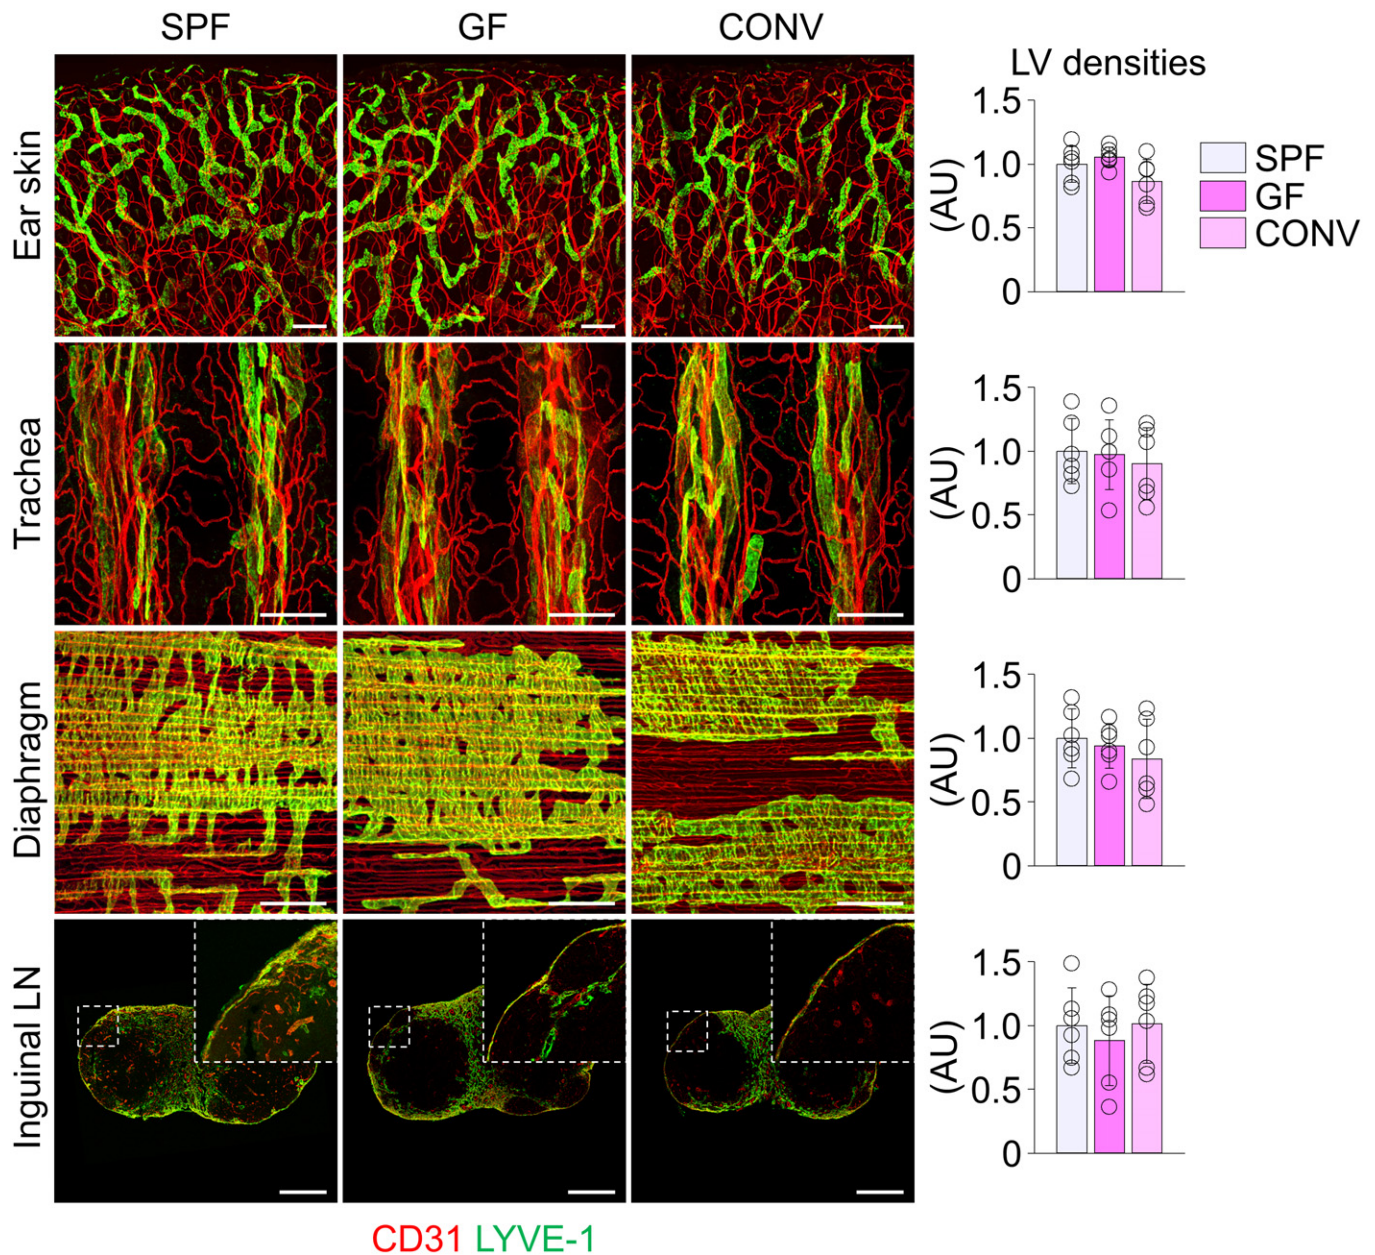

**Figure EV2. The role of microbiota in the development of extra-intestinal lymphatics is dispensable.**

Images and comparisons of LYVE-1<sup>+</sup> lymphatic vessel (LV) densities in the ear skin, trachea, diaphragm, and inguinal LN from SPF, GF, and CONV mice. AU, arbitrary unit. All scale bars, 200  $\mu$ m. Each dot indicates mean value of five sites in a mouse ( $n = 6$  mice/group). Data are represented as means  $\pm$  SD.

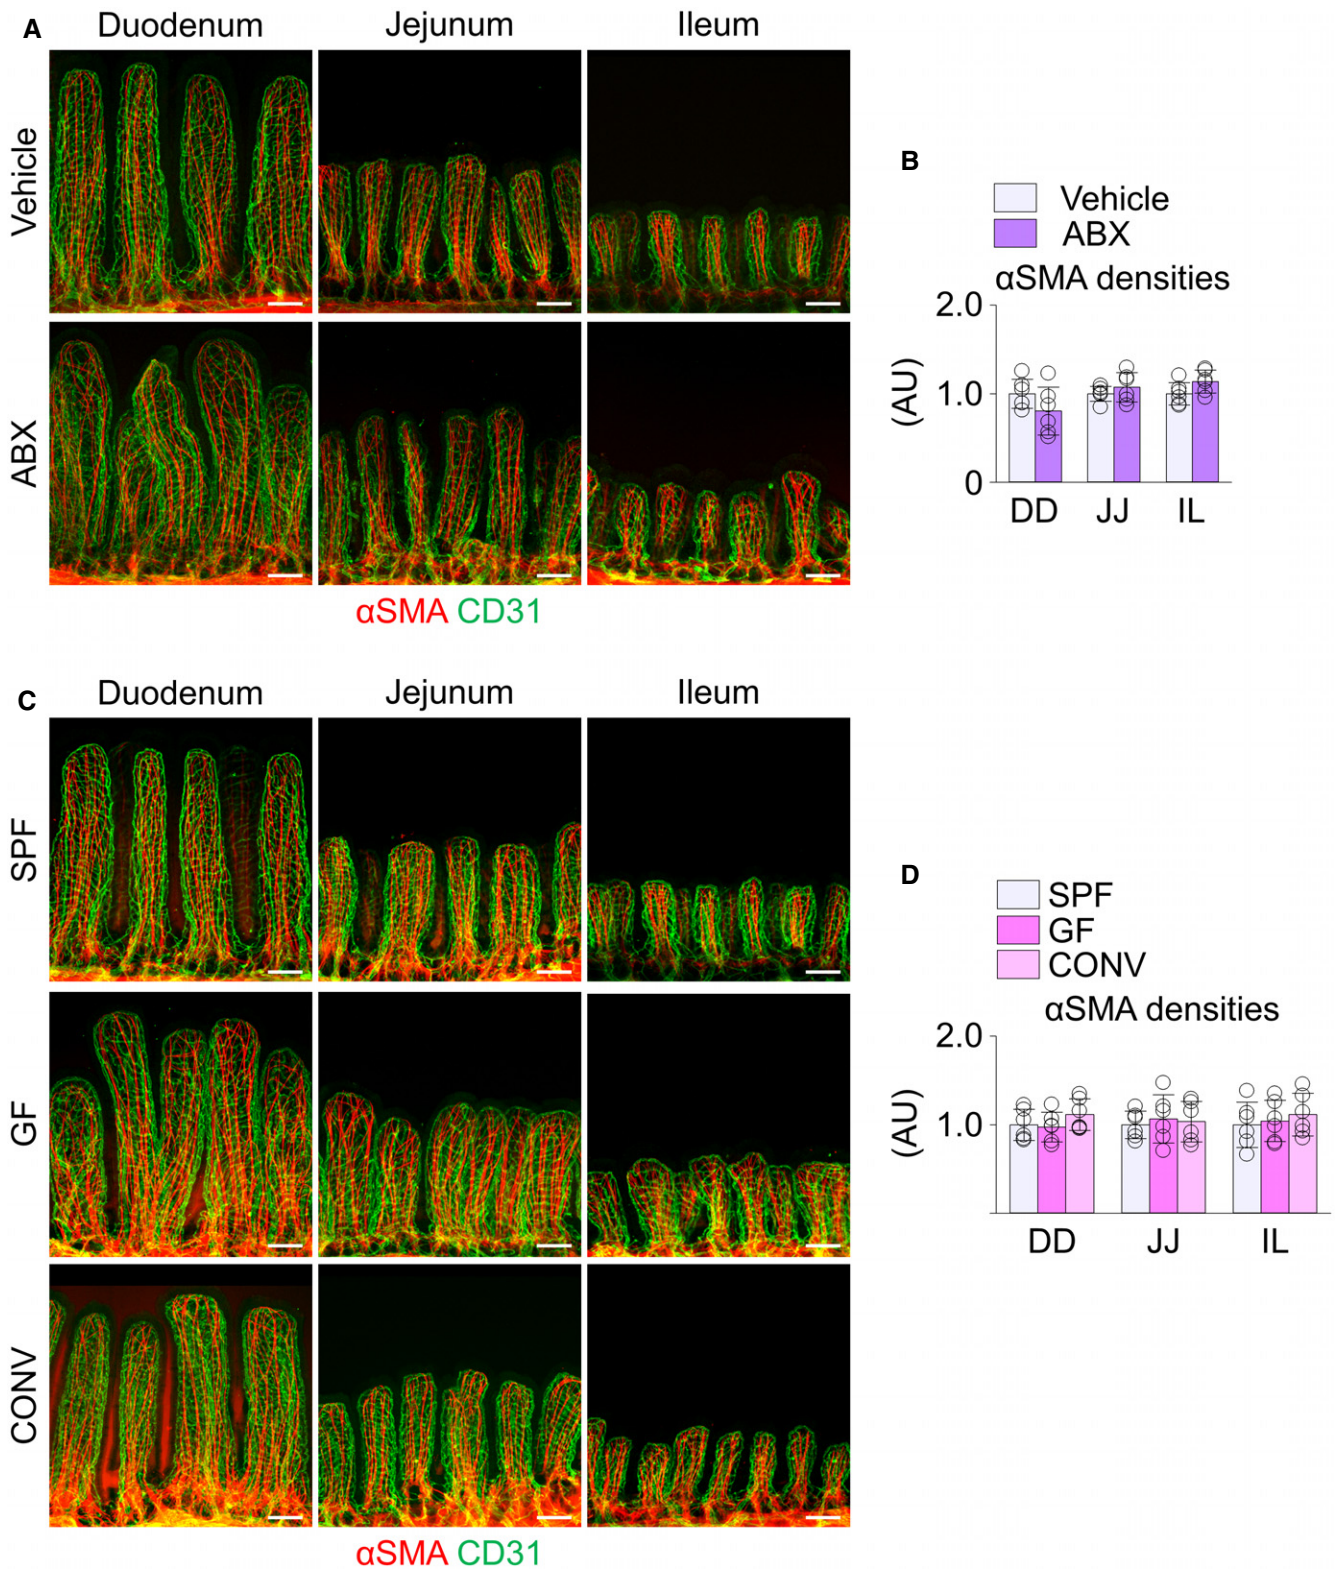

**Figure EV3. The density of SMCs in the villi is independent of gut microbiota.**

A–D Images and comparison of  $\alpha$ SMA<sup>+</sup> SMCs in the villi of duodenum (DD), jejunum (JJ), and ileum (IL) from vehicle- or ABX-treated mice (A and B) and from SPF, GF, and CONV mice (C and D). Each dot indicates mean value of five sites in a mouse ( $n = 6$  mice/group). AU, arbitrary unit. Scale bars, 100  $\mu$ m. Data are represented as means  $\pm$  SD.

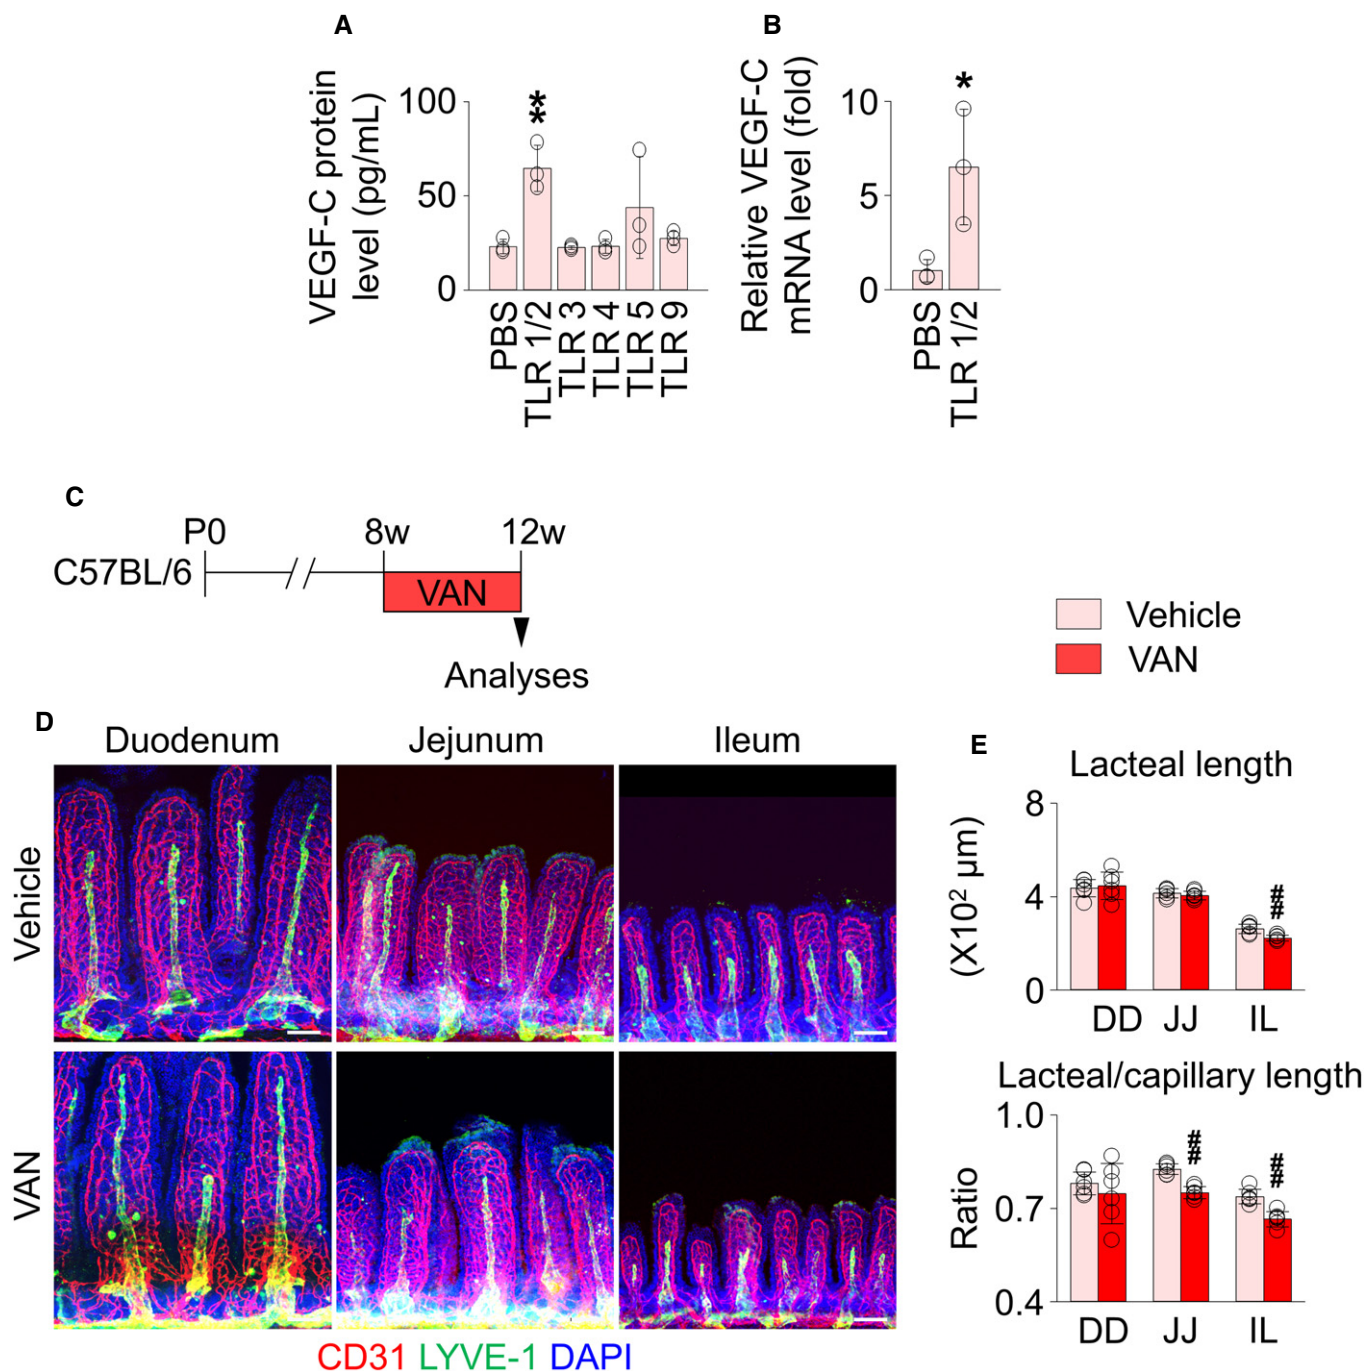

**Figure EV4. The stimulation of a specific TLR subtype promotes the VEGF-C production in the intestinal macrophages.**

**A** Measurement of VEGF-C protein level in the culture media after stimulation of primary intestinal macrophages with specific TLR agonists ( $n = 3$ ). The following TLR agonists at indicated concentrations were treated: palmitoyl-3-cysteineserine-lysine-4 (TLR1/2 agonist, 1  $\mu\text{g/ml}$ ), poly(I-C) (TLR3 agonist, 10  $\mu\text{g/ml}$ ), lipopolysaccharide (TLR4 agonist, 5  $\mu\text{g/ml}$ ), flagellin (TLR5 agonist, 0.1  $\text{mg/ml}$ ), or bacterial DNA (TLR9 agonist, 10  $\mu\text{g/ml}$ ).

**B** Comparisons of mRNA levels of VEGF-C in intestinal macrophages with or without stimulation of TLR1/2 ( $n = 3$ ). The relative levels are presented as fold (PBS as 1).

**C** Diagram for oral vancomycin (VAN) treatment in 8-week-old C57BL/6 mice.

**D, E** Images and comparisons of absolute and relative lacteal lengths in duodenum (DD), jejunum (JJ), and ileum (IL) of vehicle- and vancomycin-treated mice. Each dot indicates mean value of 5–10 villi in a mouse ( $n = 6$  mice/group). All scale bars, 100  $\mu\text{m}$ .

Data information: Data are represented as means  $\pm$  SD. \* $P < 0.05$ , \*\* $P < 0.01$  versus PBS by one-way ANOVA with Dunnett's multiple comparison test (A) and by two-tailed unpaired Student's  $t$ -test (B). ## $P < 0.01$  versus vehicle-treated mice by two-tailed unpaired Student's  $t$ -test (E).

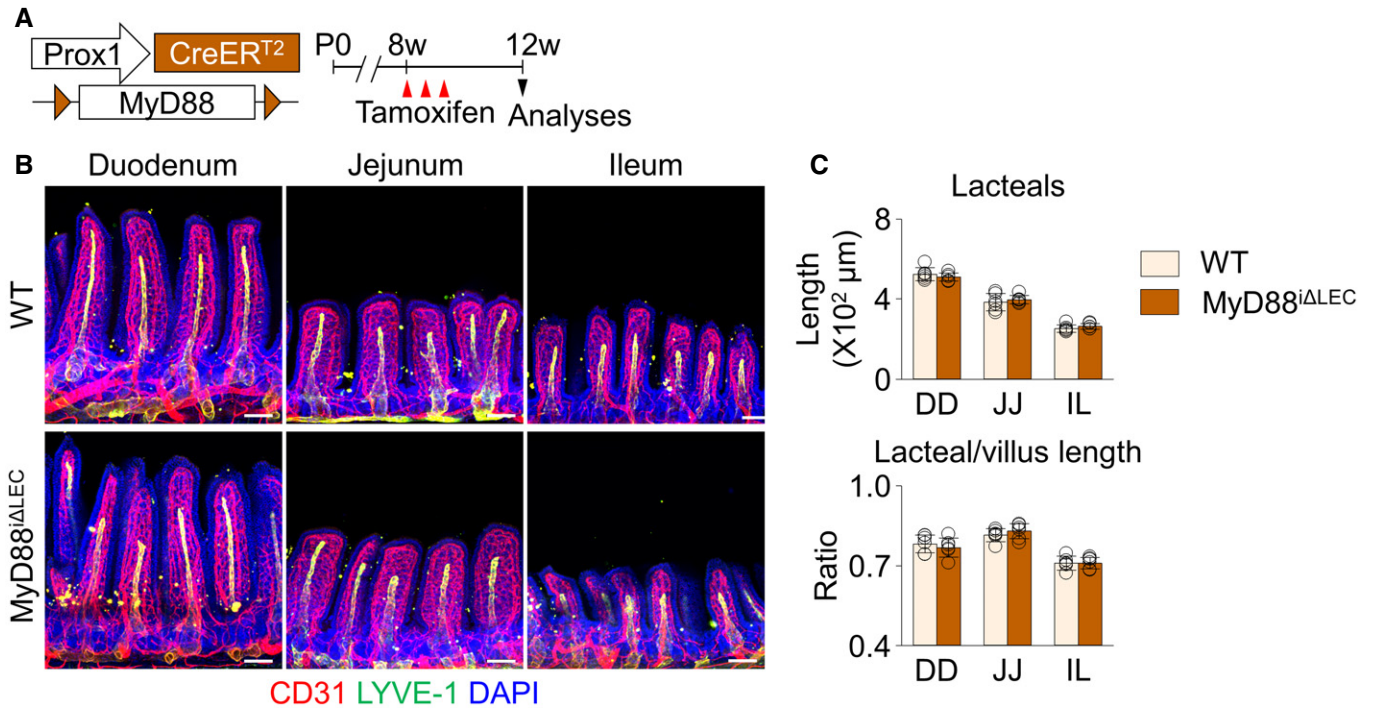

**Figure EV5. LEC-specific ablation of MyD88 does not affect lacteal integrity.**

**A** Diagram for LEC-specific ablation of MyD88 in adult mice (MyD88<sup>ΔLEC</sup>). Tamoxifen was injected subcutaneously every other day for three times.  
**B, C** Images and comparisons of absolute and relative lacteal lengths in duodenum (DD), jejunum (JJ), and ileum (IL) of wild-type (WT) and MyD88<sup>ΔLEC</sup> mice. All scale bars, 100 μm. Each dot indicates mean value of 5–10 villi in a mouse ( $n = 6$  mice/group). Data are represented as means ± SD.
